# Supplementary material
Source: HighWire-hosted journal article supplement (https://jnm.snmjournals.org/highwire/filestream/95265/field_highwire_adjunct_files/0/195800_Supplemental_Data.pdf)
Supplement: 195800_Supplemental_Data.pdf [file 195800_Supplemental_Data.pdf]

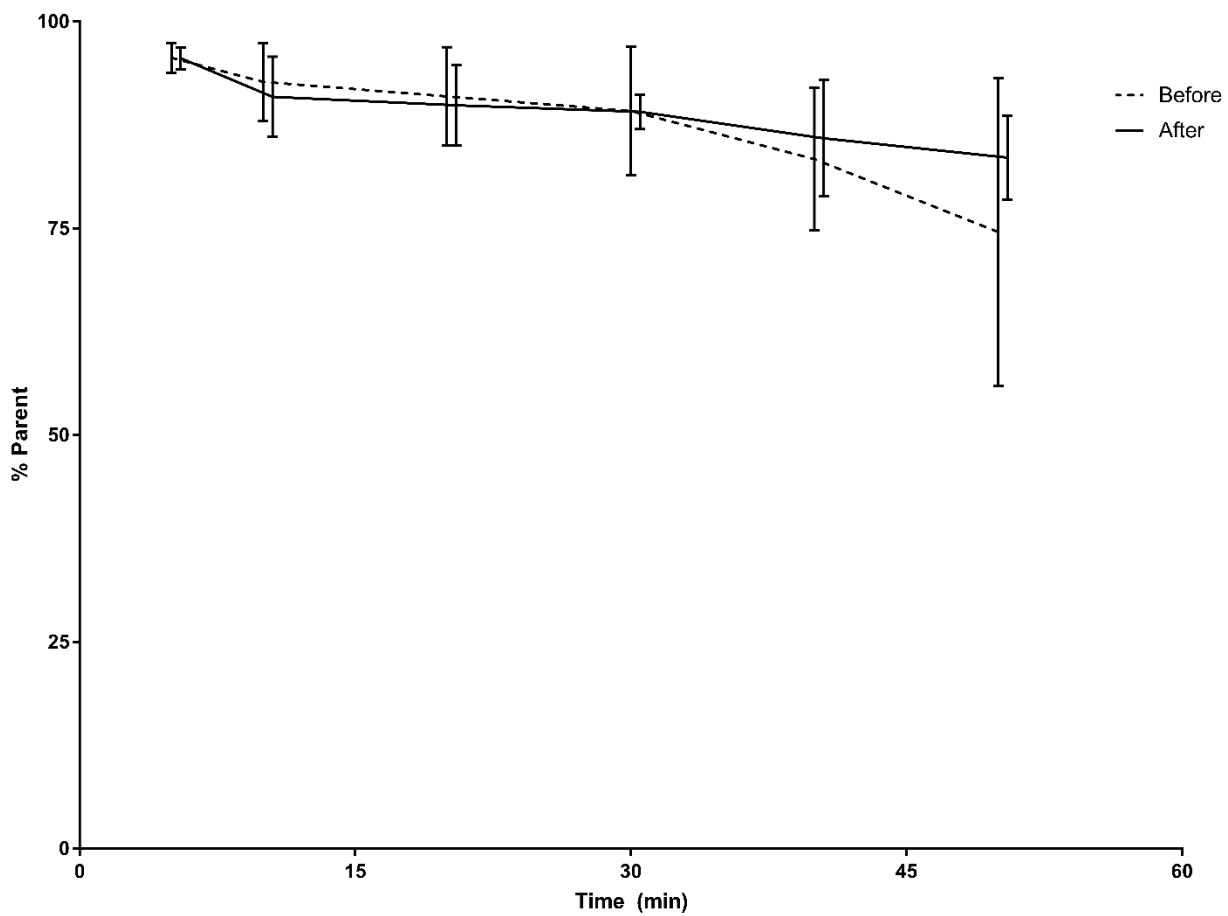

Supplemental figure 1: Erlotinib metabolism, plotted as percent parent erlotinib in the first (dashed line) and second (filled line) <sup>11</sup>C-erlotinib PET scan.
